# Supplementary figures and images for: Evaluation of macroporous blood and plasma scaffolds for skeletal muscle tissue engineering
Source: Royal Society of Chemistry journal article supplement (doi:10.1039/c2bm00054g), 2013-01-01

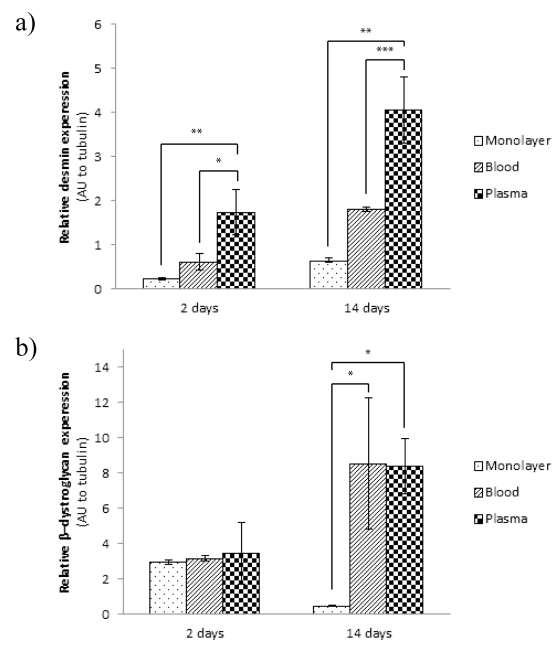

Supplement: c2bm00054g.pdf [file c2bm00054g.pdf]
